# Supplementary material for: Room temperature C–H bond activation on a [PdI–PdI] platform
Source: Royal Society of Chemistry journal article supplement (doi:10.1039/c3cc44493g), 2013-01-01
Supplement: c3cc44493g.pdf [file c3cc44493g.pdf]

**Supporting Information**  
(32 pages including the cover page)

Room Temperature C–H Bond Activation on a  
[Pd<sup>I</sup>–Pd<sup>I</sup>] Platform

**Mithun Sarkar,<sup>a</sup> Henri Doucet<sup>b</sup> and Jitendra K. Bera<sup>\*a</sup>**

*<sup>a</sup>Department of Chemistry, Indian Institute of Technology Kanpur, Kanpur 208016, India.*

*Fax: +91-512-2597436, Tel: + 91-512-2597336*

*E-mail: jbera@iitk.ac.in*

*<sup>b</sup>Institut Sciences Chimiques de Rennes, UMR 6226 CNRS Université de Rennes, “Catalyse et Organometalliques”, Campus de Beaulieu, 35042 Rennes, France.*

**\* To whom correspondence should be addressed.**

## Contents

|                                                                                 |           |
|---------------------------------------------------------------------------------|-----------|
| <b>Materials and Methods.</b>                                                   | S3        |
| <b>X-ray data collection and refinement.</b>                                    | S3 – S6   |
| <b>Synthesis of 2-Substituted-1,8-Naphthyridines <math>L^1H - L^2Br</math>.</b> | S6 – S7   |
| <b>Synthesis of complexes 1 – 4.</b>                                            | S7 – S11  |
| <b>Figure S1 – S4.</b> $^1H$ NMR spectra of $L^1H - L^2Br$ and 1 – 4.           | S12 – S15 |
| <b>Figure S5 – S8.</b> $^{13}C$ NMR spectra of $L^1H - L^2Br$ and 1 – 4.        | S16 – S19 |
| <b>Figure S9</b> $^{19}F$ NMR spectrum of 4.                                    | S19       |
| <b>Figure S10 – S13.</b> ESI-MS spectra of 1 – 4.                               | S20 – S23 |
| <b>Figure S14 – S19.</b> ORTEP diagram of 1 – 5 and anion <b>BNB</b>            | S24 – S29 |
| <b>Table S1.</b> Crystallographic Table for 1 – 5                               | S30 – S31 |
| <b>References</b>                                                               | S32       |

## Materials and Methods.

All manipulations were carried out under an inert atmosphere with the use of standard Schlenk-line techniques. Glass wares were flame-dried under vacuum prior to use. Solvents were dried by conventional methods prior to use. Pd sponge, Pd(OAc)<sub>2</sub> were purchased from Arora Matthey, India. NOBF<sub>4</sub>, NaNH<sub>2</sub> and B(C<sub>6</sub>F<sub>5</sub>)<sub>3</sub> were purchased from Sigma-Aldrich. Pd(CH<sub>3</sub>CN)<sub>4</sub>(BF<sub>4</sub>)<sub>2</sub><sup>1</sup>, Pd<sub>2</sub>(dba)<sub>3</sub>.CHCl<sub>3</sub><sup>2</sup>, [Pd<sub>2</sub>(CH<sub>3</sub>CN)<sub>6</sub>](BF<sub>4</sub>)<sub>2</sub><sup>3</sup> and 2-aminonicotinaldehyde<sup>4</sup> were synthesized following the literature procedure. 2-Substituted-1,8-Naphthyridine ligands L<sup>1</sup>H and L<sup>2</sup>H were prepared by Friedlander condensation between 2-aminonicotinaldehyde and corresponding acetyl substituted five membered heterocycles.<sup>5</sup>

<sup>1</sup>H and <sup>13</sup>C NMR spectra were obtained on a JEOL JNM-LA 500 MHz spectrometer. <sup>1</sup>H NMR chemical shifts were referenced to the residual hydrogen signal of the deuterated solvents. ESI-MS were recorded on a Waters Micro mass Quattro Micro triple-quadrupole mass spectrometer using acetonitrile as solvent. Infrared spectra were recorded on a Bruker Vertex 70 FTIR spectrophotometer in the ranges from 400 to 4000 cm<sup>-1</sup> using KBr pellets. Elemental analyses were performed on a Thermoquest EA1110 CHNS/O analyzer. The crystallized compounds were powdered, washed several times with dry diethyl ether and dried in vacuum for at least 48 h prior to elemental analyses.

## X-ray data collection and refinement.

Single crystal X-ray structural studies were performed on a CCD Bruker SMART APEX diffractometer equipped with an Oxford instruments low-temperature attachment. All the data were collected at 100(2) K using graphite-monochromated Mo-K $\alpha$  radiation ( $\lambda_{\alpha} = 0.71073 \text{ \AA}$ ). The frames were indexed, integrated and scaled using SMART and SAINT software package<sup>6</sup> and the data were corrected for absorption using the SADABS program.<sup>7</sup> The structures were

solved and refined using SHELX suite of programs<sup>8</sup> while additional crystallographic calculations were performed by the programs PLATON.<sup>9</sup> SQUEEZE option in PLATON program was used to remove the disordered water and solvent molecules from the overall intensity data of compounds wherever necessary.<sup>10</sup> Figures were drawn (40 % probability thermal ellipsoids) using ORTEP32.<sup>11</sup> Crystallographic data and pertinent refinement parameters for complexes **1** - **5** are presented in Table S1 and S2. CCDC 940018 – 940020, 952838, 952839 contain the supplementary crystallographic data for this paper. These data can be obtained free of charge from The Cambridge Crystallographic Data Centre via [www.ccdc.cam.ac.uk/data\\_request/cif](http://www.ccdc.cam.ac.uk/data_request/cif).

**Complex 1:** A red crystal of dimensions  $0.27 \times 0.25 \times 0.24 \text{ mm}^3$  was covered in paratone oil, mounted on top of a thin glass fiber with silicone grease and placed in a cold stream of nitrogen. All non hydrogen atoms were refined with anisotropic thermal parameters. All H-atoms except those of water molecules were introduced into geometrically calculated positions in the final stages of refinement and were refined according to 'riding model'. Hydrogen atoms of the coordinated water molecules were not located, but were included in the formula sum for the calculation of the intensive properties.

**Complex 2:** A red crystal of dimensions  $0.31 \times 0.23 \times 0.21 \text{ mm}^3$  was covered in paratone oil, mounted on top of a thin glass fiber with silicone grease and placed in a cold stream of nitrogen. All non hydrogen atoms were refined with anisotropic thermal parameters. All H-atoms except those of water molecules were introduced into geometrically calculated positions in the final stages of refinement and were refined according to 'riding model'. Hydrogen atoms of the coordinated water molecules were not located, but were included in the formula sum for the calculation of the intensive properties. PLATON/SQUEEZE estimated the solvent-accessible

region to contain 395 (198+197) electrons per unit cell. This amounts to nearly 99 electrons per formula unit. The electron densities are tentatively modeled as to two CH<sub>2</sub>Cl<sub>2</sub> and one H<sub>2</sub>O molecules per formula unit. These solvent and water molecules were included in the formula sum for the calculation of the intensive properties.

**Complex 3:** A red crystal of dimensions 0.25 × 0.22 × 0.16 mm<sup>3</sup> was covered in paratone oil, mounted on top of a thin glass fiber with silicone grease and placed in a cold stream of nitrogen. All H-atoms except those of water molecules were introduced into geometrically calculated positions in the final stages of refinement and were refined according to 'riding model'. Hydrogen atoms of the coordinated water molecules were not located, but were included in the formula sum. SADI and DFIX restraints were applied to model one of the BF<sub>4</sub> and the associated atoms were refined isotropically. Anisotropic treatment of C30, C31, C33, C60, C111, C112, N12 atoms in the main residue and B4A, F16A in the anion resulted in non-positive definite displacement tensors and were therefore subjected to isotropic refinement. Except these, all non-hydrogen atoms were refined with anisotropic thermal parameters. PLATON/SQUEEZE estimated the solvent-accessible region to contain a total of 672 electrons per unit cell. This amounts to 84 electrons per formula unit (z = 8). The electron densities were tentatively modeled as to two C<sub>6</sub>H<sub>6</sub> molecules per formula unit. These solvent molecules were included in the molecular formula for the calculation of the intensive properties.

**Complex 4:** A red crystal of dimensions 0.38 × 0.32 × 0.22 mm<sup>3</sup> was covered in paratone oil, mounted on top of a thin glass fiber with silicone grease and placed in a cold stream of nitrogen. All non hydrogen atoms were refined with anisotropic thermal parameters. All H-atoms were introduced in calculated positions and refined according to 'riding model', except hydrogens attached to nitrogen atoms in the anion, which were located and refined with restraints.

**Complex 5:** An yellow crystal of dimensions  $0.36 \times 0.20 \times 0.18 \text{ mm}^3$  was covered in paratone oil, mounted on top of a thin glass fiber with silicone grease and placed in a cold stream of nitrogen. All non hydrogen atoms were refined with anisotropic thermal parameters. All H-atoms were introduced into geometrically calculated positions in the final stages of the refinement and were refined according to 'riding model'.

**General synthesis for 2-Substituted-1,8-Naphthyridines ( $L^1H$ ,  $L^2H$ ):**

To an ethanolic solution of 2-aminonicotinaldehyde, was added one equivalent of aromatic ketone. The solution was then refluxed under nitrogen for 5 minutes and five drops of freshly prepared saturated methanolic solution of KOH was added. After refluxing for 24 hours, the solvent was evaporated under reduced pressure and the crude product was purified by silica gel column chromatography using ethyl acetate and petroleum ether as eluent.

**2-(N-methylpyrrolyl)-1,8-naphthyridine( $L^1H$ ):** Yield: 82%.  $^1H$  NMR (500 MHz,  $CDCl_3$ ):  $\delta$  9.03 (dd,  $J = 4.3 \text{ Hz}$ ,  $1.8 \text{ Hz}$ , 1H), 8.08 (dd,  $J = 7.9 \text{ Hz}$ ,  $1.8 \text{ Hz}$ , 1H), 8.04 (d,  $J = 8.9 \text{ Hz}$ , 1H), 7.80 (d,  $J = 8.9 \text{ Hz}$ , 1H), 7.36 – 7.39 (m, 1H), 6.90 (dd,  $J = 3.7 \text{ Hz}$ ,  $J = 1.6 \text{ Hz}$ , 1H), 6.84 (dd,  $J = 2.8 \text{ Hz}$ ,  $1.8 \text{ Hz}$ , 1H), 6.23 (dd,  $J = 4.0 \text{ Hz}$ ,  $2.4 \text{ Hz}$ , 1H), 4.32 (s, 3H).  $^{13}C$  NMR (126 MHz,  $CDCl_3$ ):  $\delta$  155.5, 152.8, 137.3, 136.6, 131.2, 129.4, 121.2, 120.9, 120.7, 114.3, 108.3, 38.8.

**2-(2,5-dimethylthiophen-3-yl)-1,8-Naphthyridine ( $L^2H$ ):** Yield: 80%.  $^1H$  NMR (500 MHz,  $CDCl_3$ ):  $\delta$  9.09 (dd  $J = 4.2 \text{ Hz}$ ,  $1.8 \text{ Hz}$ , 1H), 8.15 (d,  $J = 8.3 \text{ Hz}$ , 1H), 8.13 (dd,  $J = 8 \text{ Hz}$ ,  $1.7 \text{ Hz}$ , 1H), 7.69 (d,  $J = 8.3 \text{ Hz}$ , 1H), 7.40–7.43 (m, 1H), 7.20 (s, 1H), 2.81 (s, 3H), 2.45 (s, 3H).  $^{13}C$  NMR (126 MHz,  $CDCl_3$ ):  $\delta$  158.8, 155.5, 153.2, 139.8, 137.4, 137.2, 135.9, 135.6, 126.9, 122.2, 121.5, 121.0, 15.9, 15.2.

**2-(4-bromo-2,5-dimethylthiophen-3-yl)-1,8-Naphthyridine ( $L^2Br$ ):** To 10 ml of an acetic acid solution containing 2-(2,5-dimethylthiophen-3-yl)-1,8-Naphthyridine ( $L^3H$ ) was added bromine

at 0°C in a ratio 1:1.1. The mixture was slowly brought to room temperature and stirred for overnight. A nice yellow precipitate was formed which was filtered, washed with little acetic acid and dried in air. The precipitate was then taken in a beaker containing water and made basic (pH = 8) by addition of saturated sodium carbonate solution. Then it was transferred to a separating funnel and extracted with dichloromethane. The organic layers were combined, dried over anhydrous sodium sulfate and evaporated under reduced pressure to a brown paste. Finally, it was purified by silica gel column chromatography using 30% EtOAc/PE as eluent. Yellowish white powder. Yield: 75%. <sup>1</sup>H NMR (500 MHz, CDCl<sub>3</sub>): δ 9.21 (dd, *J* = 4 Hz, 1.7 Hz, 1H), 8.39 (d, *J* = 8 Hz, 1H), 8.31 (d, *J* = 8.6 Hz, 1H), 7.82 (d, *J* = 8.3 Hz, 1H), 7.61–7.63 (m, 1H), 2.58 (s, 3H), 2.42 (s, 3H). <sup>13</sup>C NMR (126 MHz, CDCl<sub>3</sub>): δ 158.6, 155.0, 153.1, 137.9, 136.7, 136.1, 131.2, 124.9, 122.2, 121.7, 109.0, 15.1, 15.0. ESI-MS (CH<sub>3</sub>CN), *m/z*: 320.9887 [M+H]<sup>+</sup>.

#### **Synthesis of [Pd<sub>2</sub>(C<sup>^</sup>N-L<sup>1</sup>)(μ-C<sup>^</sup>N-L<sup>1</sup>)(L<sup>1</sup>H)(H<sub>2</sub>O)][(BF<sub>4</sub>)<sub>2</sub>] (1)**

[Pd<sub>2</sub>(CH<sub>3</sub>CN)<sub>6</sub>](BF<sub>4</sub>)<sub>2</sub> (50 mg, 0.079 mmol) was dissolved in 1 mL of dry CH<sub>3</sub>CN and added drop-wise to a dichloromethane solution (15 mL) of 2-(1-methyl-1H-pyrrol-2-yl)-1,8-Naphthyridine (L<sup>1</sup>H) (66 mg, 0.32 mmol) via cannula at room temperature under N<sub>2</sub> atmosphere. Immediately after the addition, the solution became red. It was then stirred for additional 6 hours at room temperature. After stirring, it was passed through a schlenk frit using a pad of celite to prevent any black particles formed in the reaction mixture. The solution was then concentrated to a small volume under reduced pressure and 10 mL diethyl ether was added while stirring to get a red precipitate. The precipitate was washed with diethyl ether (3 × 10 mL) and dried under vacuum to afford **1** as deep red microcrystalline solid. Block shaped X-ray-quality crystals were grown by layering petroleum ether onto a dichloromethane solution of **1** inside an 8 mm o.d. vacuum-sealed glass tube. Yield: 65 mg (80%). <sup>1</sup>H NMR (500 MHz, CD<sub>3</sub>CN): δ 8.89 (d, 7.6 Hz,

2H), 8.84 (d, 5.2 Hz, 2H), 8.47 (d, 9.2 Hz, 1H), 8.40 (d, 8.9 Hz, 2H), 8.15 (d, 8.9 Hz, 2H), 7.98 (br,m, 1H), 7.92 (d, 8.9 Hz, 1H), 7.83 – 7.87 (m, 2H), 7.26 (br,m, 2H), 7.13 (br,m, 2H), 6.63 – 6.64 (m, 2H), 6.28 – 6.30 (m, 3H), 4.50 (s, 3H), 4.19 (s, 6H).  $^{13}\text{C}$  NMR (126 MHz,  $\text{CD}_3\text{CN}$ ):  $\delta$  207.2, 172.0, 157.3, 156.4, 154.1, 147.4, 144.6, 141.9, 141.2, 137.9, 137.7, 137.1, 133.8, 132.6, 131.4, 130.2, 130.1, 124.3, 123.5, 122.8, 122.3, 120.9, 119.5, 119.1, 118.3, 111.0, 110.0, 109.6, 109.3, 108.6, 40.8, 40.0, 38.7. IR (KBr,  $\text{cm}^{-1}$ ):  $\nu$  3453 (br), 3098 (w), 1609 (s), 1531 (s), 1493 (m), 1453 (m), 1427 (s), 1401 (s), 1387 (s), 1324 (m), 1062 (vs,  $\text{BF}_4^-$ ), 840 (m), 743 (m). ESI-MS ( $\text{CH}_3\text{CN}$ ),  $m/z$ : 924.08  $[\text{Pd}_2(\text{L}^1)_2(\text{L}^1\text{H})(\text{BF}_4)]^+$ , 523.08  $[\text{Pd}_2(\text{L}^1)_2(\text{L}^1\text{H})^2]^{2+}$ , 418.54  $[\text{Pd}_2(\text{L}^1)_2(\text{L}^1\text{H})^2]^{2+}$ . Anal. Calcd for  $\text{C}_{39}\text{H}_{31}\text{N}_9\text{B}_2\text{F}_8\text{Pd}_2$ : C, 46.28; H, 3.09; N, 12.45. Found: C, 45.78; H, 2.98; N, 13.42.

### Synthesis of $[\text{Pd}_3(\text{C}^{\wedge}\text{N-L}^2)(\mu\text{-C}^{\wedge}\text{N-L}^2)_2(\text{L}^2\text{H})(\text{H}_2\text{O})][\text{BF}_4]_3$ (**2**)

Complex **2** was synthesized by the reaction between  $[\text{Pd}_2(\text{CH}_3\text{CN})_6](\text{BF}_4)_2$  (50 mg, 0.079 mmol) and 2-(2,5-dimethylthiophen-3-yl)-1,8-Naphthyridine ( $\text{L}^2\text{H}$ ) (77 mg, 0.32 mmol) following a procedure similar to that described for the synthesis of **1** except stirring was continued for 12 hours due to gradual change of color of the solution from orange to red. A red powder was obtained. Block shaped X-ray-quality crystals were grown by layering petroleum ether onto a dichloromethane solution of **2** inside an 8 mm o.d. vacuum-sealed glass tube. Yield: 69 mg (56%).  $^1\text{H}$  NMR (500 MHz,  $\text{CD}_3\text{CN}$ ):  $\delta$  9.01 – 9.04 (m, 4H), 8.88 – 8.92 (m, 1H), 8.65 – 8.67 (m, 2H), 8.51 – 8.55 (m, 1H), 8.45 – 8.47 (m, 1H), 8.34 – 8.40 (m, 1H), 8.25 – 8.30 (m, 1H), 8.15 – 8.16 (m, 2H), 7.95 – 8.02 (m, 4H), 7.63 – 7.67 (m, 1H), 7.41 – 7.47 (m, 1H), 7.32 (br,m, 2H), 2.83 (s, 6H), 2.82 (s, 3H), 2.73 (s, 3H), 2.46 (s, 6H), 2.43 (s, 6H).  $^{13}\text{C}$  NMR (126 MHz,  $\text{CD}_3\text{CN}$ ):  $\delta$  207.0, 202.9, 170.2, 160.0, 159.2, 157.8, 157.6, 154.1, 153.8, 153.0, 147.9, 146.8, 146.7, 146.6, 145.2, 143.3, 142.1, 141.8, 141.5, 139.3, 139.0, 138.9, 138.7, 137.1, 136.6,



135.3, 134.3, 127.4, 127.0, 126.5, 125.4, 124.5, 124.2, 122.7, 122.2, 108.6, 107.0, 102.4, 101.7, 17.2, 15.7, 15.5, 14.3, 14.1. IR (KBr,  $\text{cm}^{-1}$ ):  $\nu$  3420 (br), 3080 (w), 2968 (w), 2923 (w), 1631 (s), 1608 (s), 1554 (m), 1523 (m), 1496 (m), 1434 (m), 1381 (m), 1270 (w), 1219 (w), 1061 (vs,  $\text{BF}_4^-$ ), 846 (m), 777 (m). ESI-MS ( $\text{CH}_3\text{CN}$ ),  $m/z$ : 465  $[\text{Pd}_2(\text{L}^2)_2(\text{L}^2\text{H})]^{2+}$ , 386  $[\text{Pd}(\text{L}^2)(\text{CH}_3\text{CN})]^+$ , 585.04  $[\text{Pd}(\text{L}^2)(\text{L}^2\text{H})]^+$ . Anal. Calcd for  $\text{C}_{56}\text{H}_{45}\text{N}_8\text{B}_3\text{F}_{12}\text{S}_4\text{Pd}_3$ : C, 43.73; H, 2.95; N, 7.29. Found: C, 44.18; H, 2.88; N, 7.08.

### Synthesis of $[\text{Pd}_3(\text{C}^{\wedge}\text{N-L}^2)(\mu\text{-C}^{\wedge}\text{N-L}^2)_2(\text{L}^2\text{Br})(\text{H}_2\text{O})][\text{BF}_4]_3$ (**3**)

Complex **3** was synthesized by the reaction between  $[\text{Pd}_2(\text{CH}_3\text{CN})_6](\text{BF}_4)_2$  (50 mg, 0.079 mmol) and 2-(4-bromo-2,5-dimethylthiophen-3-yl)-1,8-Naphthyridine ( $\text{L}^2\text{Br}$ ) (102 mg, 0.32 mmol) following a procedure similar to that described for the synthesis of **2**. A red powder was obtained. Needle shaped X-ray-quality crystals were grown by layering petroleum ether onto a dichloromethane solution of **3** inside an 8 mm o.d. vacuum-sealed glass tube. Yield: 100 mg (68%).  $^1\text{H}$  NMR (500 MHz,  $\text{CD}_3\text{CN}$ ):  $\delta$  9.08 – 9.09 (m, 1H), 8.86 – 8.93 (m, 2H), 8.79 (d, 8.8 Hz, 1H), 8.69 (d, 8.3 Hz, 1H), 8.61 (d, 9.5 Hz, 1H), 8.52 (d, 8.5 Hz, 1H), 8.37 – 8.39 (m, 1H), 8.25 – 8.32 (m, 3H), 8.16 – 8.17 (m, 1H), 7.89 – 7.99 (m, 2H), 7.78 – 7.81 (m, 1H), 7.57 – 7.62 (m, 2H), 7.22 – 7.24 (m, 1H), 6.91 – 6.93 (m, 1H), 6.81 – 6.83 (m, 1H), 3.02 (s, 3H), 2.84 (s, 3H), 2.82 (s, 3H), 2.77 (s, 3H), 2.64 (s, 3H), 2.62 (s, 3H), 2.35 (s, 3H), 2.29 (s, 3H).  $^{13}\text{C}$  NMR (126 MHz,  $\text{CD}_3\text{CN}$ ):  $\delta$  209.7, 202.0, 176.9, 162.7, 162.5, 161.8, 160.3, 159.2, 157.4, 157.0, 155.7, 154.9, 154.8, 154.6, 154.3, 152.8, 150.2, 146.1, 144.9, 144.7, 144.3, 143.1, 142.6, 142.2, 142.1, 142.0, 141.7, 141.6, 141.4, 141.0, 140.4, 139.7, 137.9, 137.8, 137.6, 134.5, 128.4, 127.2, 125.1, 124.2, 123.2, 121.6, 121.2, 121.0, 120.6, 108.6, 100.2, 15.8, 15.2, 14.5, 14.2, 13.4, 12.7. IR (KBr,  $\text{cm}^{-1}$ ):  $\nu$  3465 (br), 3010 (w), 2923 (w), 2855 (w), 1607 (s), 1553 (m), 1527 (s), 1435 (s), 1374 (s), 1058 (vs,  $\text{BF}_4^-$ ), 846 (m), 784 (m). ESI-MS ( $\text{CH}_3\text{CN}$ ),  $m/z$ : 504  $[\text{Pd}_2(\text{L}^2)_2(\text{L}^2\text{Br})]^{2+}$ , 386

$[\text{Pd}(\text{L}^2)(\text{CH}_3\text{CN})]^+$ , 662.95  $[\text{Pd}(\text{L}^2)(\text{L}^2\text{Br})]^+$ . Anal. Calcd for  $\text{C}_{56}\text{H}_{44}\text{N}_8\text{S}_4\text{Br}_1\text{B}_3\text{F}_{12}\text{Pd}_3$ : C, 41.60; H, 2.74; N, 6.93. Found: C, 41.22; H, 2.88; N, 6.33.

### Synthesis of $[\text{Pd}_2(\text{C}^{\wedge}\text{N-L}^1)(\mu\text{-C}^{\wedge}\text{N-L}^1)(\text{L}^1\text{H})_2][(\text{BNB})_2]$ (**4**)

$[\text{Pd}_2(\text{CH}_3\text{CN})_6(\text{BNB})_2$ :  $[\text{Pd}_2(\text{CH}_3\text{CN})_6](\text{BF}_4)_2$  (50 mg, 0.079 mmol) was dissolved in 10 mL of dry  $\text{CH}_3\text{CN}$  and to this sodium di-tris(pentafluorophenyl)borane amide ( $\text{Na}[\text{NH}_2\{\text{B}(\text{C}_6\text{F}_5)_3\}_2]$ ), NaBNB (168 mg, 0.158 mmol) was added. The orange solution was then stirred at room temperature for 30 minutes and passed through a Schlenk frit to prevent  $\text{NaBF}_4$  formed during the reaction. Then, solvent was removed completely under reduced pressure to get an orange mass. IR (KBr,  $\text{cm}^{-1}$ ):  $\nu$  3390 (w,  $\text{NH}_2$ ), 3344 (w,  $\text{NH}_2$ ), 2335 (w, CN), 2310 (w, CN), 2280 (w, CN), 1638 (m,  $\text{NH}_2$ ), 1466 (vs, BNB).

Subsequently, this orange mass was dissolved in 10 mL dry dichloromethane and to this dichloromethane solution (1 mL) of 2-(1-methyl-1H-pyrrol-2-yl)-1,8-naphthyridine ( $\text{L}^1\text{H}$ ) (66 mg, 0.32 mmol) was added dropwisely via cannula at room temperature under  $\text{N}_2$  atmosphere. Immediately after the addition, the solution became red. It was then stirred for additional 6 hours at room temperature. After stirring, it was passed through a Schlenk frit using a pad of celite to prevent any black particles if formed in the reaction mixture. The solution was then concentrated to a small volume under reduced pressure and 10 mL petroleum ether was added while stirring to get a red precipitate. The precipitate was washed with petroleum ether ( $3 \times 10$  mL) and dried under vacuum to afford **4** as deep red microcrystalline solid. Block shaped X-ray-quality crystals were grown by layering petroleum ether onto a dichloromethane solution of **4** inside an 8 mm o.d. vacuum-sealed glass tube. Yield: 173 mg (70%).  $^1\text{H}$  NMR (500 MHz,  $\text{CD}_3\text{CN}$ ):  $\delta$  8.95 – 8.97 (m, 2H), 8.37 – 8.41 (m, 3H), 8.29 (d, 7.0 Hz, 1H), 8.13 (d, 7.9 Hz, 1H), 8.06 – 8.07 (m, 1H), 7.94 – 7.96 (m, 2H), 7.86 – 7.88 (m, 1H), 7.68 – 7.74 (m, 2H), 7.53 – 7.58 (m, 2H), 7.32 –

7.37 (m, 2H), 7.24 – 7.26 (m, 2H), 7.15 (br,s, 1H), 7.06 (d, 2.1 Hz, 1H), 6.92 (s, 1H), 6.83 (s, 1H), 6.81 (s, 1H), 6.71 (br,s, 1H), 6.66 (d, 2.5 Hz, 1H), 6.61 – 6.62 (m, 1H), 6.28 (d, 2.5 Hz, 1H), 6.10 – 6.12 (m, 1H), 6.04 (br,s, 1H), 5.67 (br, 4H), 4.52 (s, 3H), 3.97 (s, 3H), 3.86 (s, 3H), 3.81 (s, 3H).  $^{13}\text{C}$  NMR (126 MHz,  $\text{CD}_3\text{CN}$ ):  $\delta$  207.8, 170.2, 160.2, 157.4, 157.2, 157.1, 155.8, 154.9, 154.7, 154.5, 153.7, 153.4, 153.0, 152.6, 148.8, 146.9, 144.9, 143.5, 142.2, 141.6, 141.2, 140.3, 140.2, 140.1, 139.9, 139.6, 139.5, 138.3, 138.2, 138.1, 137.8, 137.7, 137.6, 137.5, 137.2, 136.5, 136.3, 135.9, 135.8, 135.7, 135.6, 133.6, 133.3, 131.0, 130.6, 130.3, 129.4, 123.9, 122.0, 121.7, 121.4, 121.3, 121.1, 121.0, 120.7, 119.8, 119.2, 116.8, 116.5, 116.3, 116.2, 111.2, 108.6, 108.5, 40.9, 37.9, 36.7, 36.5.  $^{19}\text{F}$  NMR (470 MHz,  $\text{CD}_3\text{CN}$ ):  $\delta$  -133.6 (d, 17.8 Hz, 12F), -160.4 (t, 18.3 Hz, 6F), -166.3 (t, 18.3 Hz, 12F). IR (KBr,  $\text{cm}^{-1}$ ):  $\nu$  3392 (w,  $\text{NH}_2$ ), 3340 (w,  $\text{NH}_2$ ), 2928 (w), 1645 (m,  $\text{NH}_2$ ), 1613 (m), 1556 (m), 1518 (s), 1466 (vs, BNB), 1427 (m), 1402 (m), 1390 (m), 1379 (m), 1276 (m), 1100 (s), 1084 (s), 986 (s), 978 (s), 957 (m), 837 (m), 780 (m). ESI-MS ( $\text{CH}_3\text{CN}$ ),  $m/z$ : 418.54  $[\text{Pd}_2(\text{L}^1)_2(\text{L}^1\text{H})]^{2+}$  Anal. Calcd for  $\text{C}_{124}\text{H}_{46}\text{N}_{14}\text{B}_4\text{F}_{60}\text{Pd}_2$ : C, 47.62; H, 1.48; N, 6.27. Found: C, 47.78; H, 1.38; N, 6.42.

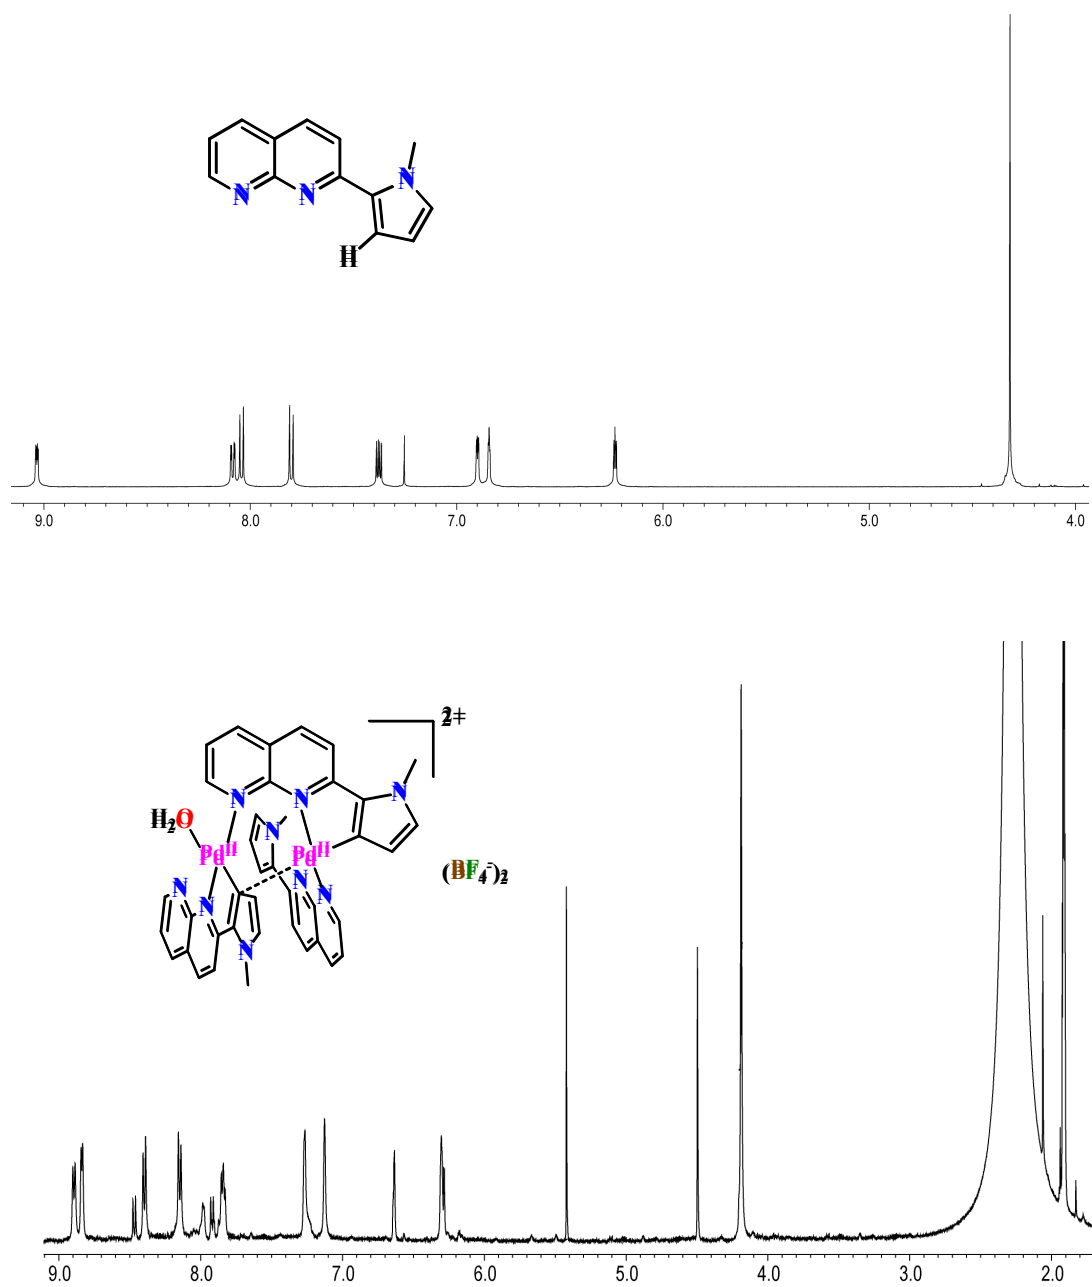

**Figure S1.**  $^1\text{H}$  NMR spectra of ligand  $\text{L}^1\text{H}$  (top) and complex **1** (bellow).

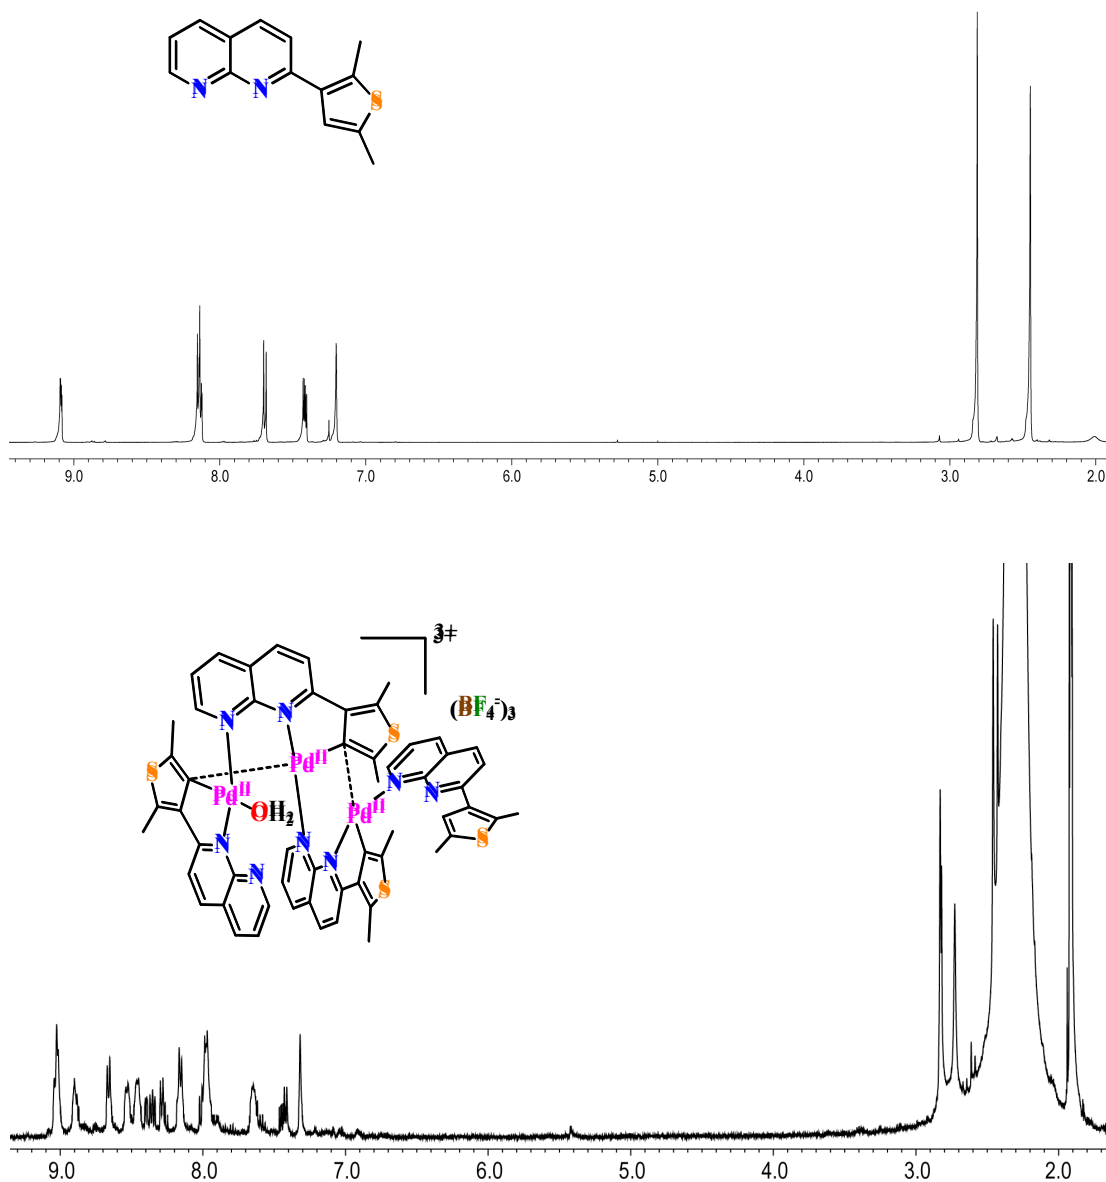

**Figure S2.** <sup>1</sup>H NMR spectra of ligand **L<sup>2</sup>H** (top) and complex **2** (bellow).

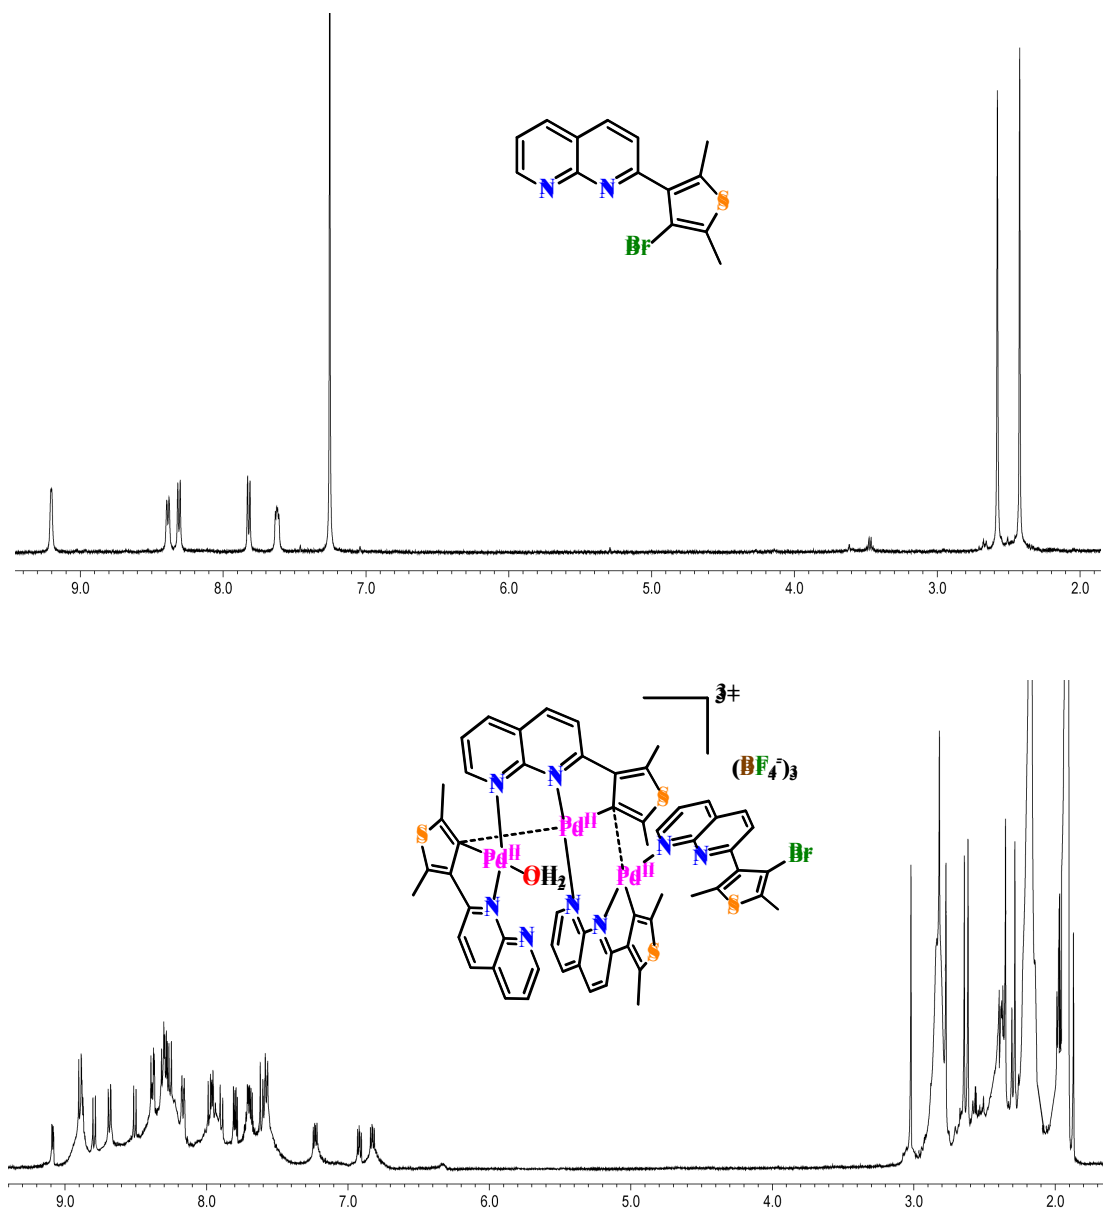

**Figure S3.** <sup>1</sup>H NMR spectra of ligand L<sup>2</sup>Br (top) and complex 3 (bellow).

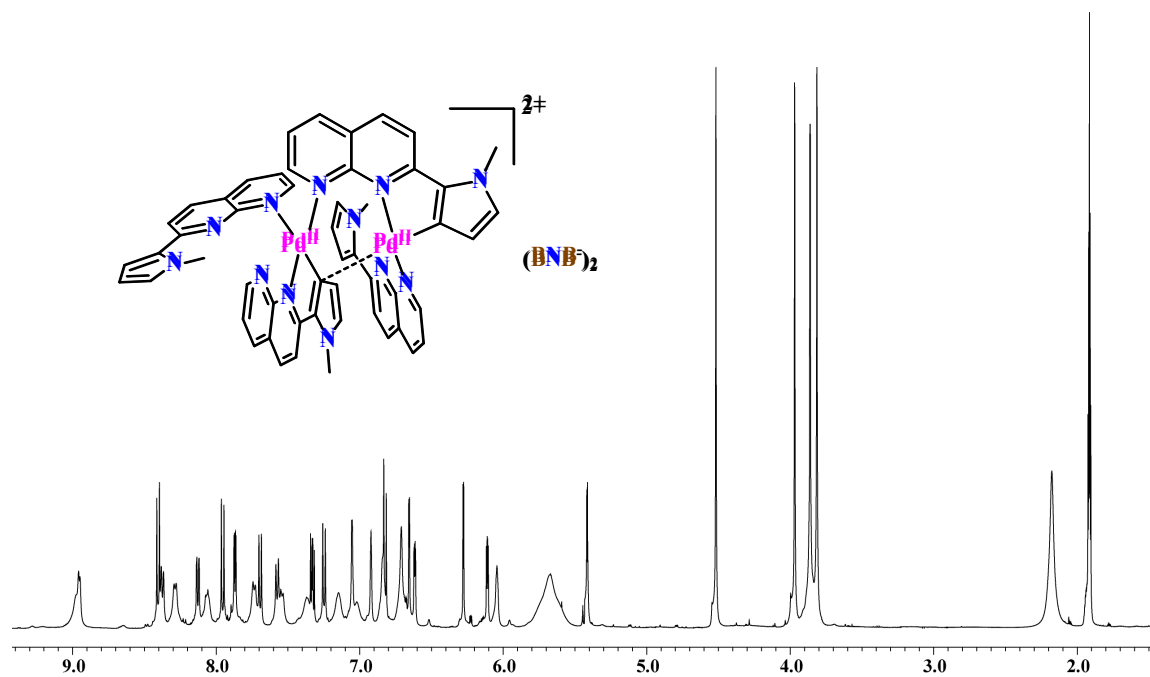

**Figure S4.**  $^1\text{H}$  NMR spectrum of complex 4.

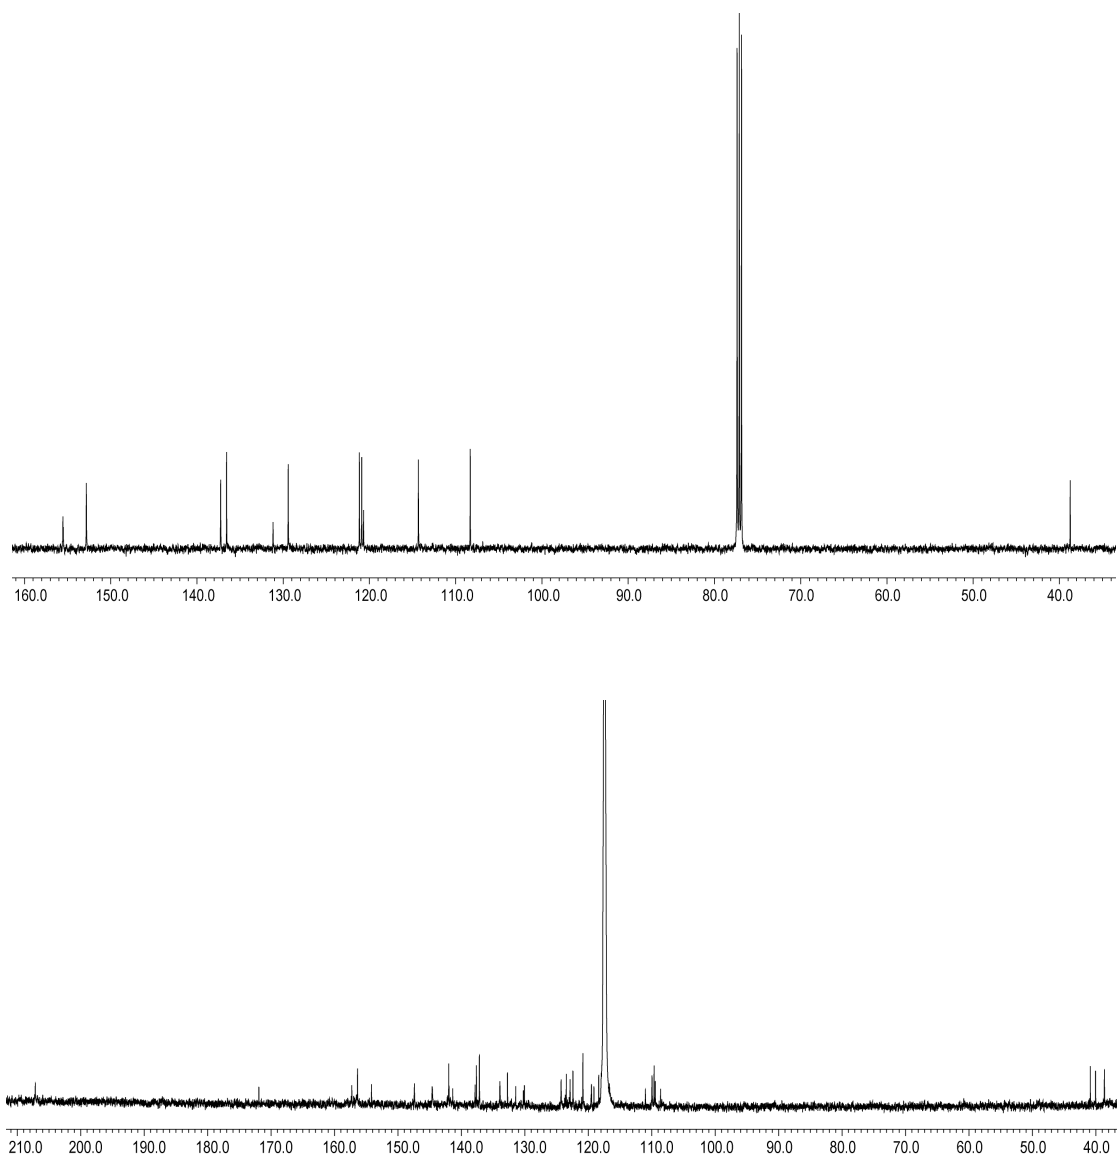

**Figure S5.**  $^{13}\text{C}$  NMR spectra of ligand  $\text{L}^1\text{H}$  (top) and complex **1** (bellow).



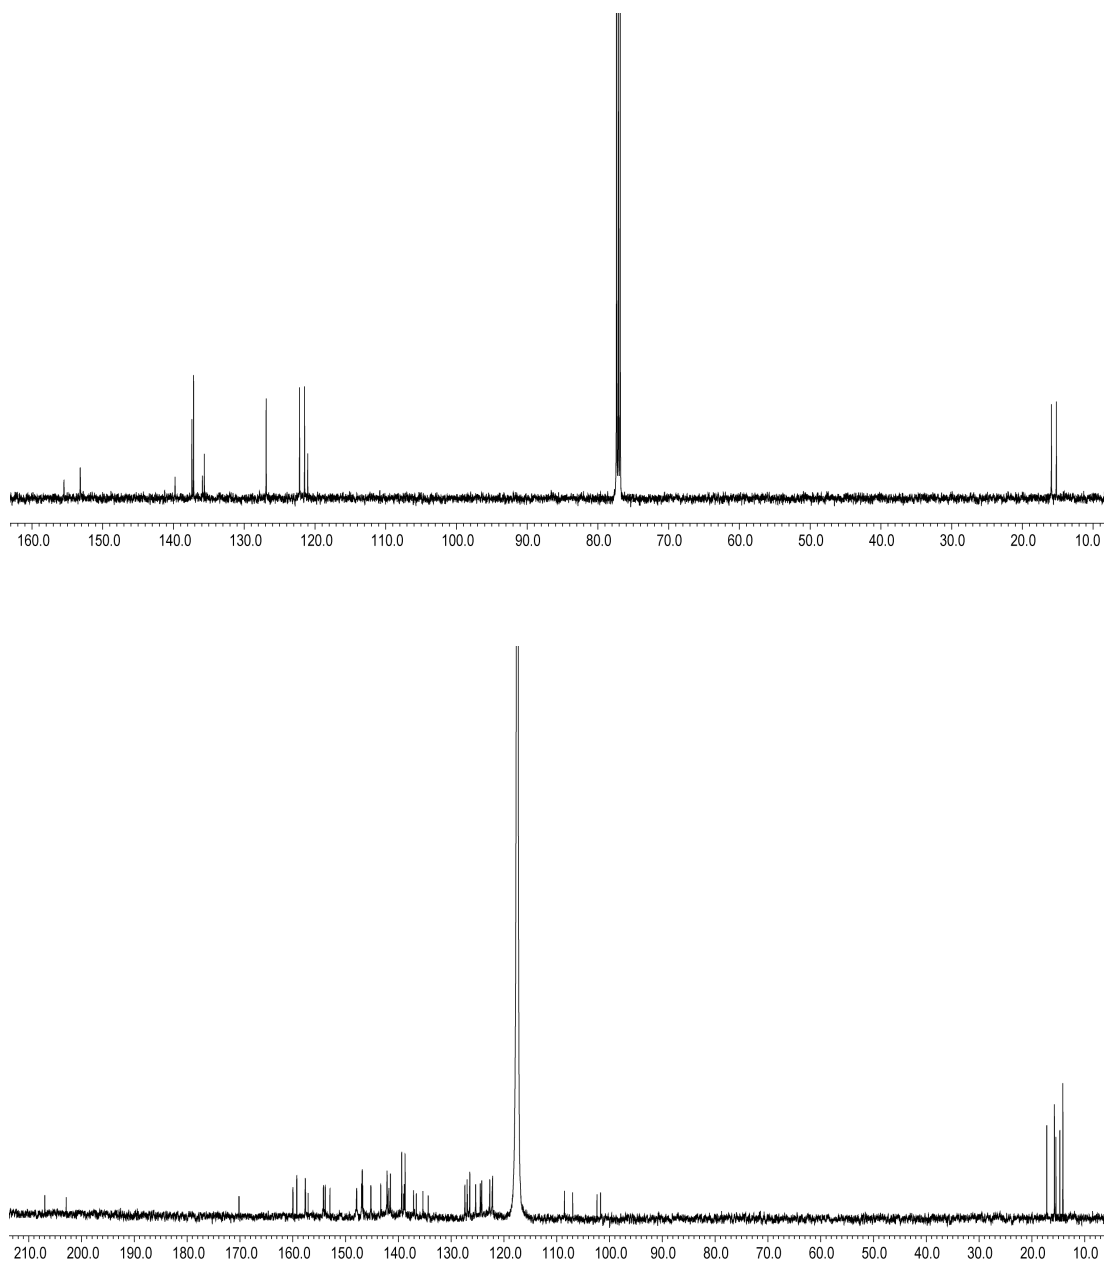

**Figure S6.**  $^{13}\text{C}$  NMR spectra of ligand  $\text{L}^2\text{H}$  (top) and complex **2** (bellow).

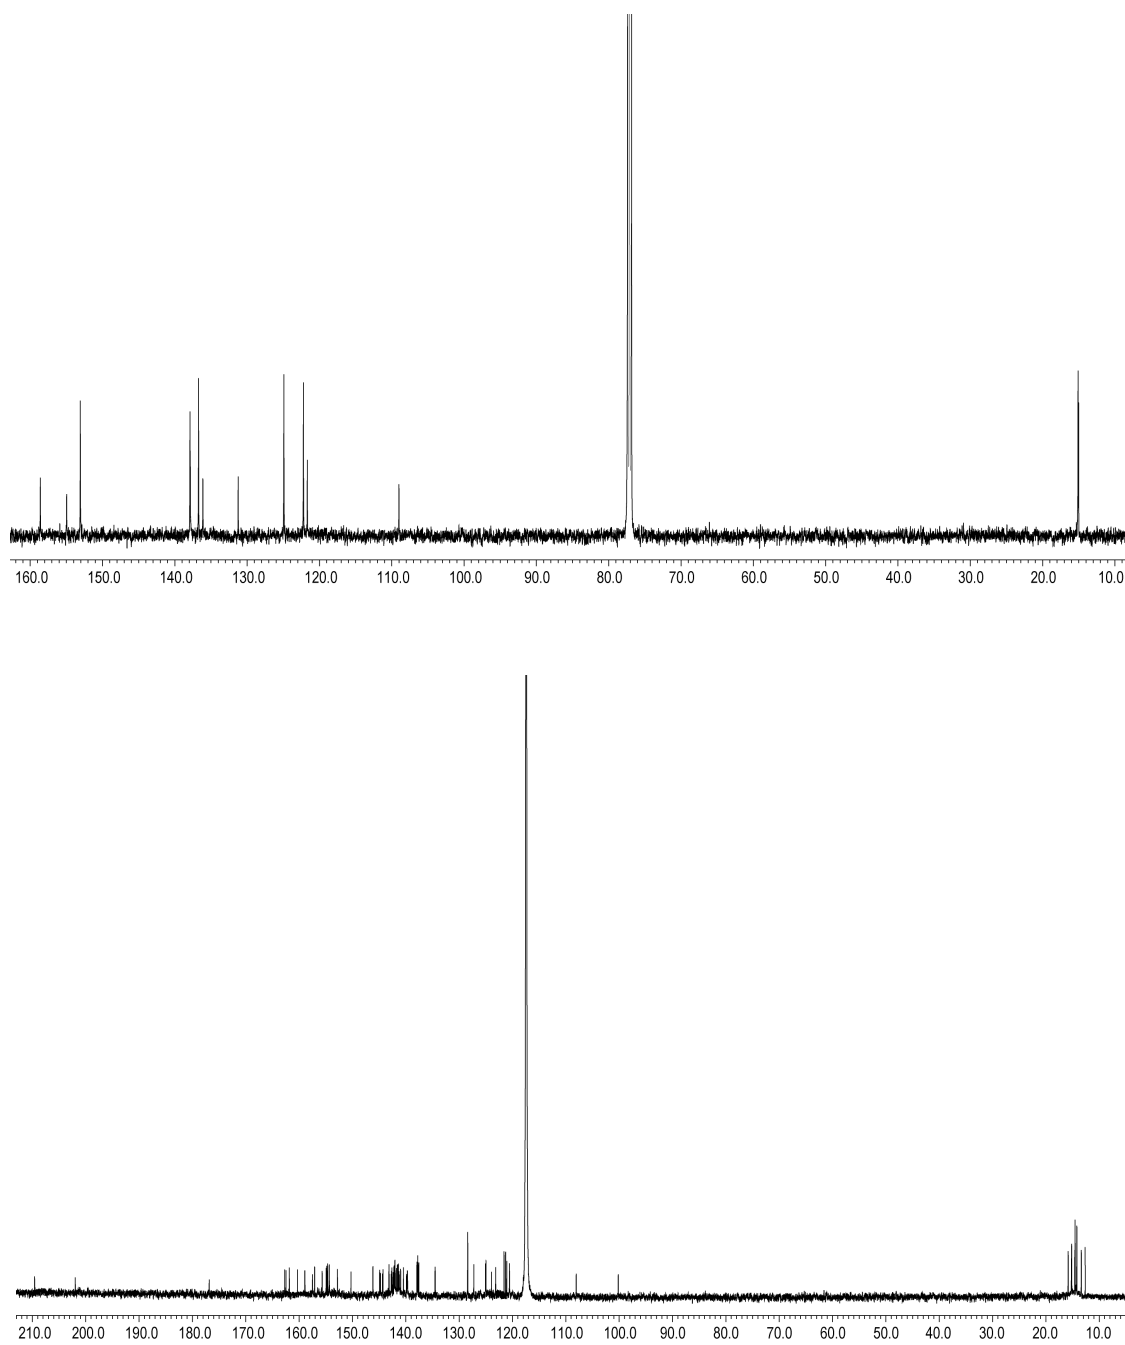

**Figure S7.**  $^{13}\text{C}$  NMR spectra of ligand  $\text{L}^2\text{Br}$  (top) and complex **3** (bellow).

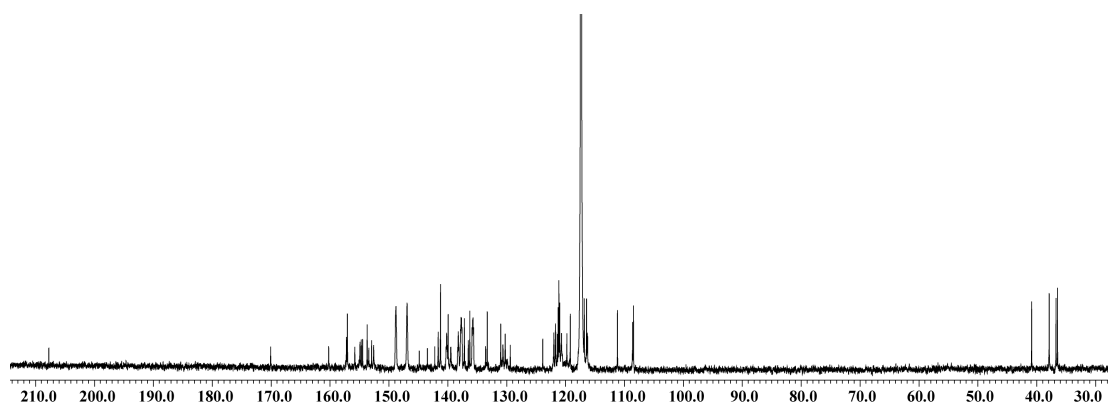

**Figure S8.**  $^{13}\text{C}$  NMR spectrum of complex 4

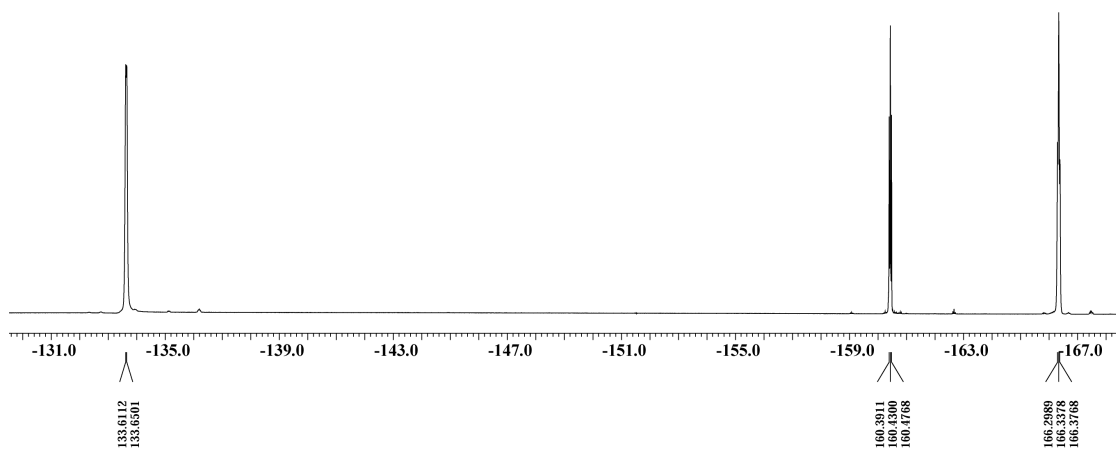

**Figure S9.**  $^{19}\text{F}$  NMR spectrum of complex 4

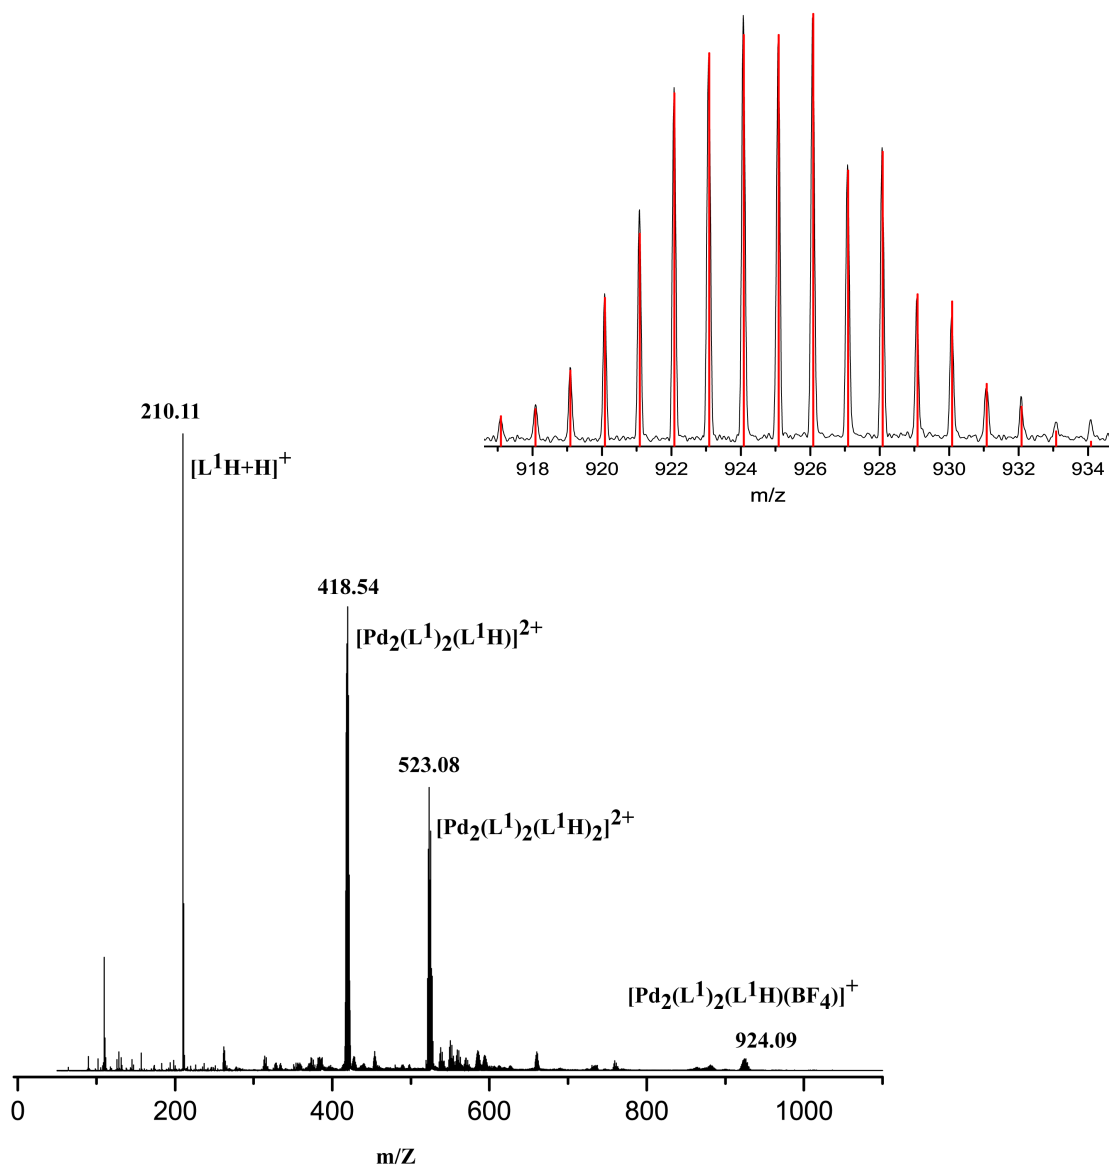

**Figure S10:** Experimental (black) and simulated (red) ESI-MS Spectrum for  $[Pd_2(L^1)_2(L^1H)(BF_4)]^+$  at  $m/z = 924.08$  ( $z=1$ ) in complex **1**(top) and ESI-MS spectrum in the full range for complex **1**(bellow).

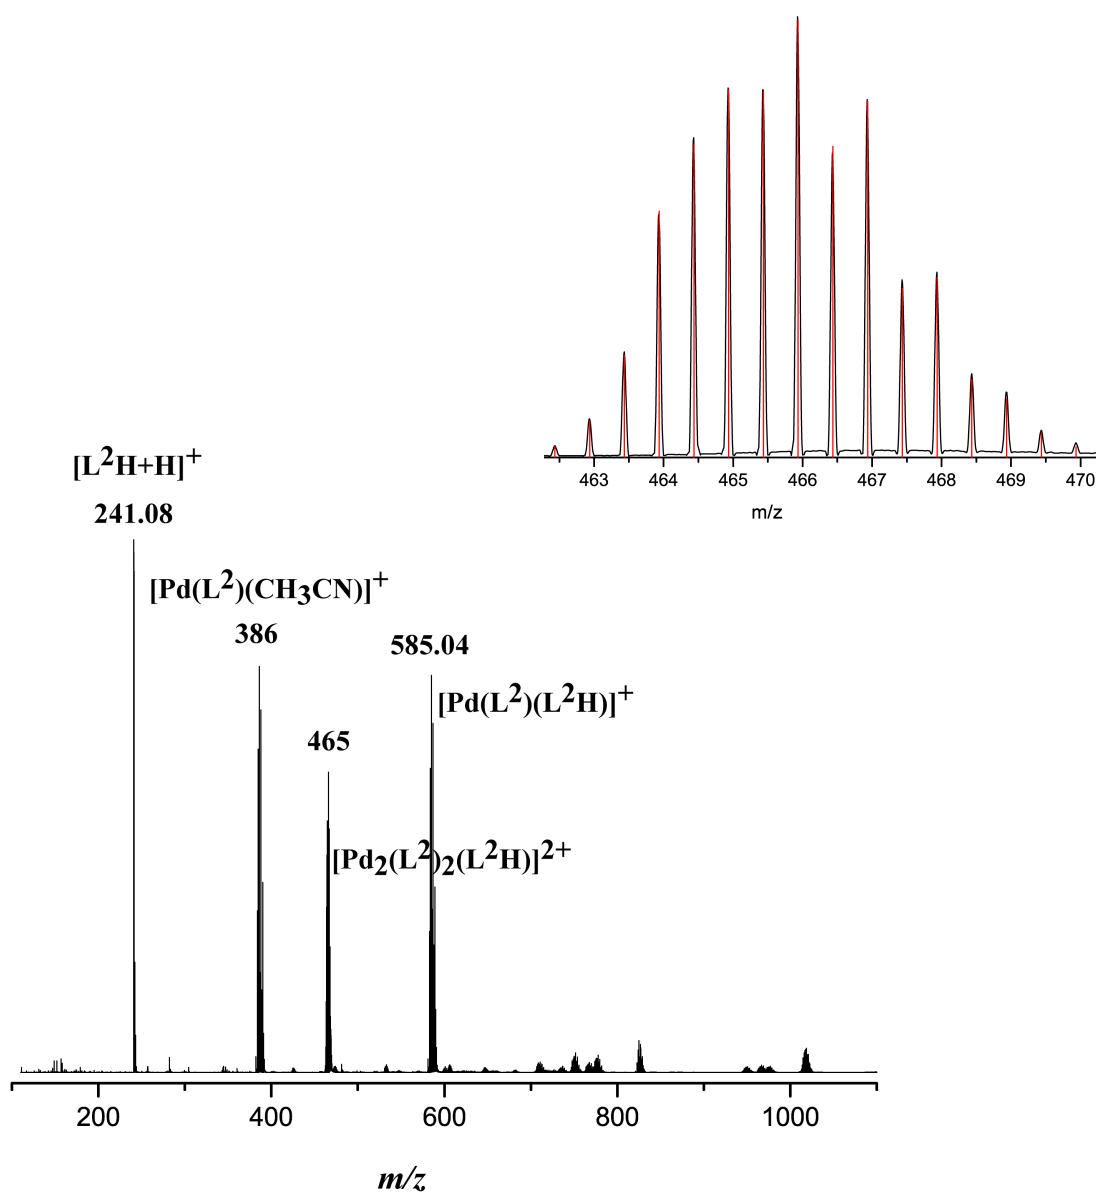

**Figure S11:** Experimental (black) and simulated (red) ESI-MS Spectrum for  $[Pd_2(L^2)_2(L^2H)]^{2+}$  at  $m/z = 465$  ( $z=2$ ) in complex **2** (top) and ESI-MS spectrum in the full range for complex **2** (bellow).

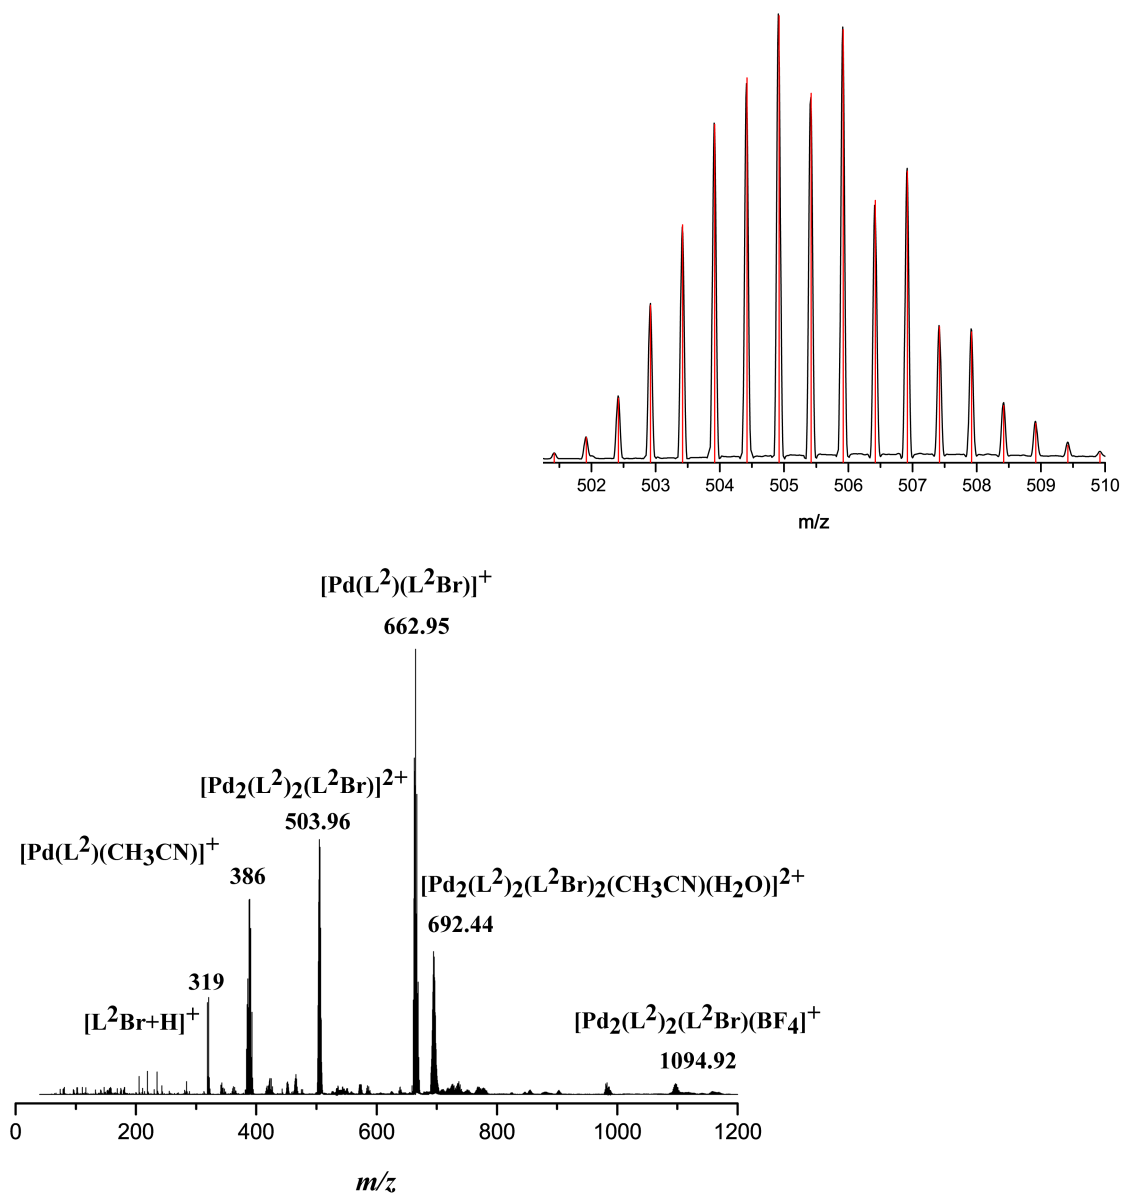

**Figure S12:** Experimental (black) and simulated (red) ESI-MS Spectrum for  $[Pd_2(L^2)_2(L^2Br)]^{2+}$  at  $m/z = 504$  ( $z=2$ ) in complex **3** (top) and ESI-MS spectrum in the full range for complex **3** (bellow).

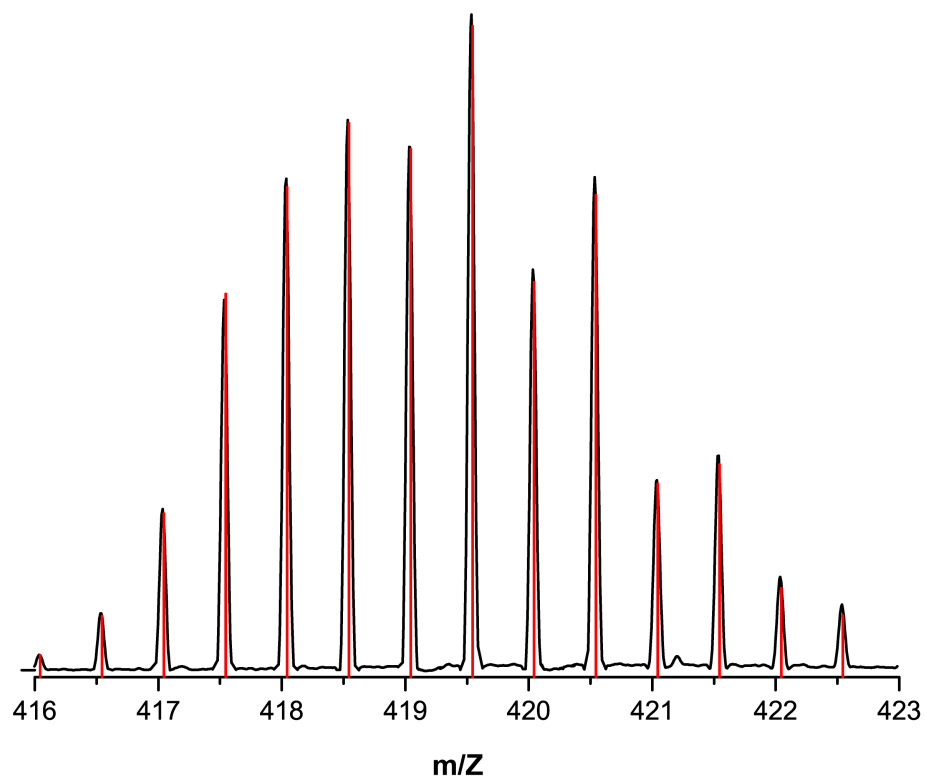

**Figure S13:** Experimental (black) and simulated (red) ESI-MS Spectrum for  $[\text{Pd}_2(\text{L}^1)_2(\text{L}^1\text{H})]^{2+}$  at  $m/z = 418.54$  ( $z=2$ ) in complex **4**

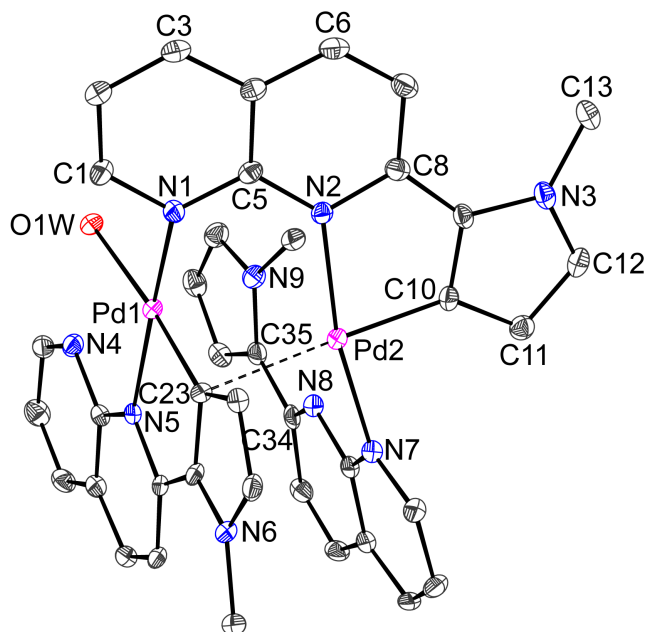

**Figure S14.** ORTEP diagram (40% probability thermal ellipsoids) of the cationic unit  $[\text{Pd}_2(\text{C}^{\text{N}}\text{-L}^1)(\mu\text{-C}^{\text{N}}\text{NL}^1)(\text{L}^1\text{H})(\text{H}_2\text{O})]^{2+}$  in complex **1** with important atoms labeled. Hydrogen atoms are omitted for the sake of clarity. Selected bond distances (Å) and angles (deg): Pd1...Pd2 = 3.043(1), Pd1–N1 2.032(4), Pd1–N5 2.092(4), Pd2–N2 2.088(4), Pd2–N7 2.026(4), Pd1–C23 1.943(5), Pd2–C10 1.953(5), Pd2–C23 2.410(5), Pd1–C23–Pd2 88.04(2), N1–C5–N2–Pd2 17.1(6), N2–C5–N1–Pd1 14.3(6), N4–C18–N5–Pd1 4.8(6), N2–C8–C9–C10 5.7(6), N5–C21–C22–C23 4.8(6), N8–C34–C35–N9 10.5(7).



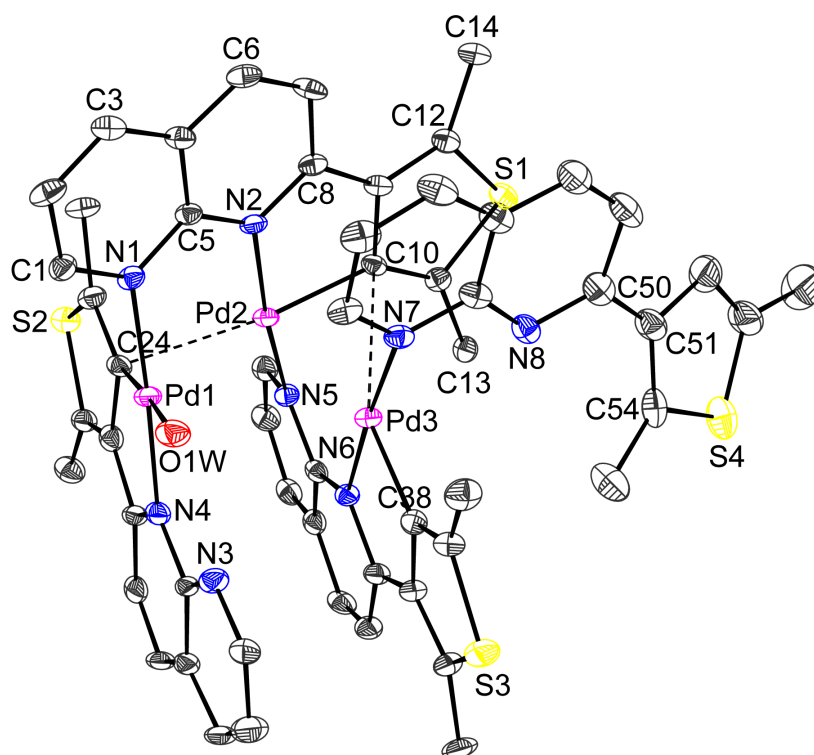

**Figure S15.** ORTEP diagram (40% probability thermal ellipsoids) of the cationic unit  $[\text{Pd}_3(\text{C}^{\wedge}\text{N}-\text{L}^2)(\mu\text{-C}^{\wedge}\text{N}-\text{L}^2)_2(\text{L}^2\text{H})(\text{H}_2\text{O})]^{3+}$  in complex **2** with important atoms labeled. Hydrogen atoms are omitted for the sake of clarity. Selected bond distances (Å) and angles (deg): Pd1 $\cdots$ Pd2 2.816(1), Pd2 $\cdots$ Pd3 2.675(1), Pd1–C24 1.977(8), Pd2–C24 2.518(8), Pd2–C10 1.977(7), Pd3–C10 2.973(7), Pd3–C38 1.963(8), Pd1–C24–Pd2 76.5(3), Pd2–C10–Pd3 61.6(2), N8–C50–C51–C54 27.9(1), N4–C22–C23–C24 2.9(1), N2–C8–C9–C10 1.0(1), N6–C36–C37–C38 1.5(1).

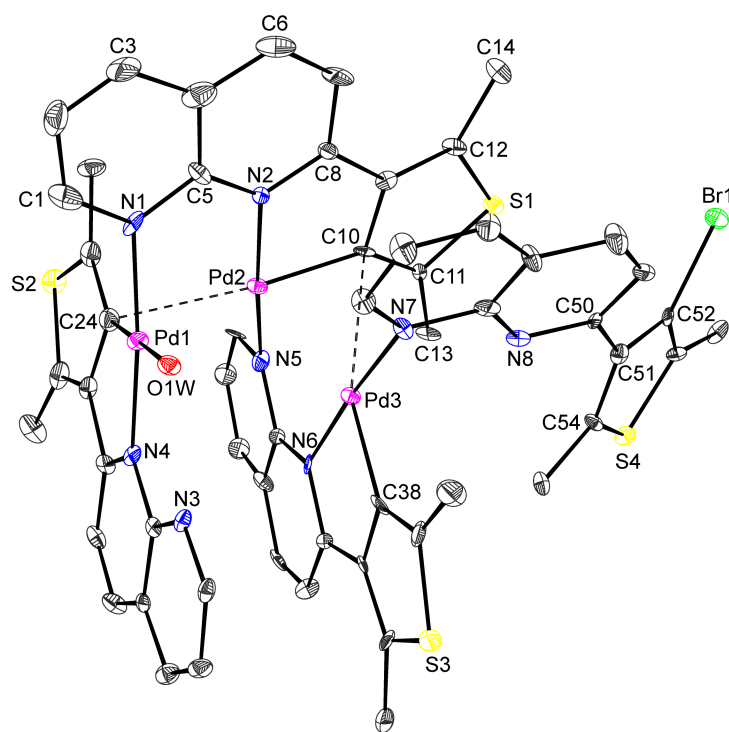

**Figure S16.** ORTEP diagram (40% probability thermal ellipsoids) of the cationic unit  $[\text{Pd}_3(\text{C}^{\wedge}\text{N-L}^2)(\mu\text{-C}^{\wedge}\text{N-L}^2)_2(\text{L}^2\text{Br})(\text{H}_2\text{O})]^{3+}$  in complex **3** with important atoms labeled. Hydrogen atoms are omitted for the sake of clarity. Selected bond distances (Å) and angles (deg): Pd1···Pd2 2.789(2), Pd2···Pd3 2.705(1), Pd1–C24 1.946(1), Pd2–C24 2.596(1), Pd2–C10 1.979(1), Pd3–C10 2.914(1), Pd3–C38 1.998(1), Pd1–C24–Pd2 74.3(4), Pd2–C10–Pd3 63.8(3), N8–C50–C51–C54 33.5(2), N4–C22–C23–C24 6.4(2), N2–C8–C9–C10 0.9(2), N6–C36–C37–C38 2.5(2).

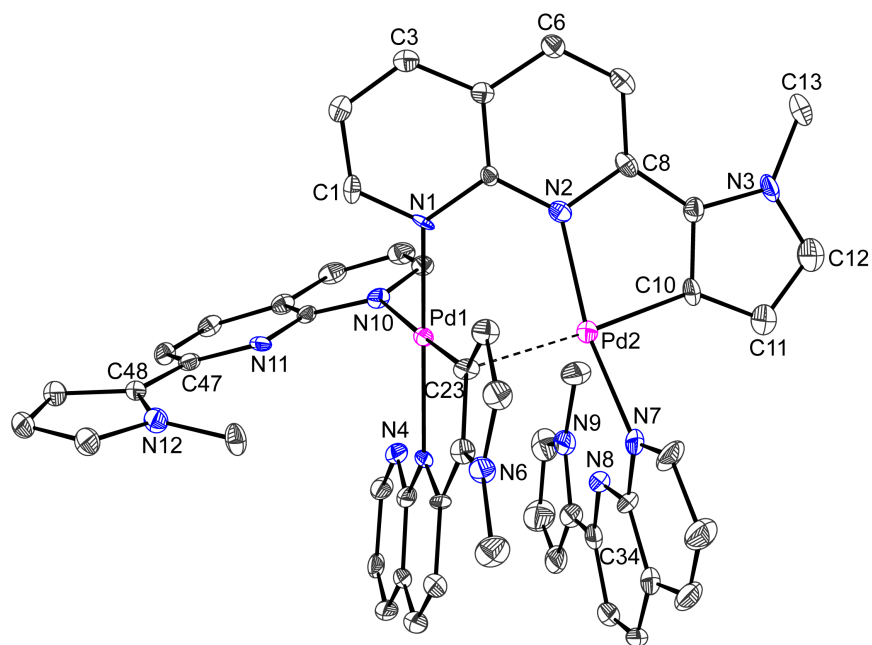

**Figure S17.** ORTEP diagram (40% probability thermal ellipsoids) of the cationic unit  $[\text{Pd}_2(\text{C}^{\text{N}}\text{-L}^1)(\mu\text{-C}^{\text{N}}\text{NL}^1)(\text{L}^1\text{H})_2]^{2+}$  in complex **4** with important atoms labeled. Hydrogen atoms are omitted for the sake of clarity. Selected bond distances (Å) and angles (deg): Pd1...Pd2 2.863(1), Pd1–N1 2.025(4), Pd1–N5 2.112(4), Pd2–N2 2.083(4), Pd2–N7 2.054(4), Pd1–C23 1.976(5), Pd2–C10 1.961(5), Pd2–C23 2.407(5), Pd1–C23–Pd2 80.9(2), N1–C5–N2–Pd2 21.9(6), N2–C5–N1–Pd1 4.4(6), N2–C8–C9–C10 7.9(7), N5–C21–C22–C23 0.5(6), N8–C34–C35–N9 8.9(1), N11–C47–C48–N12 16.7(7).

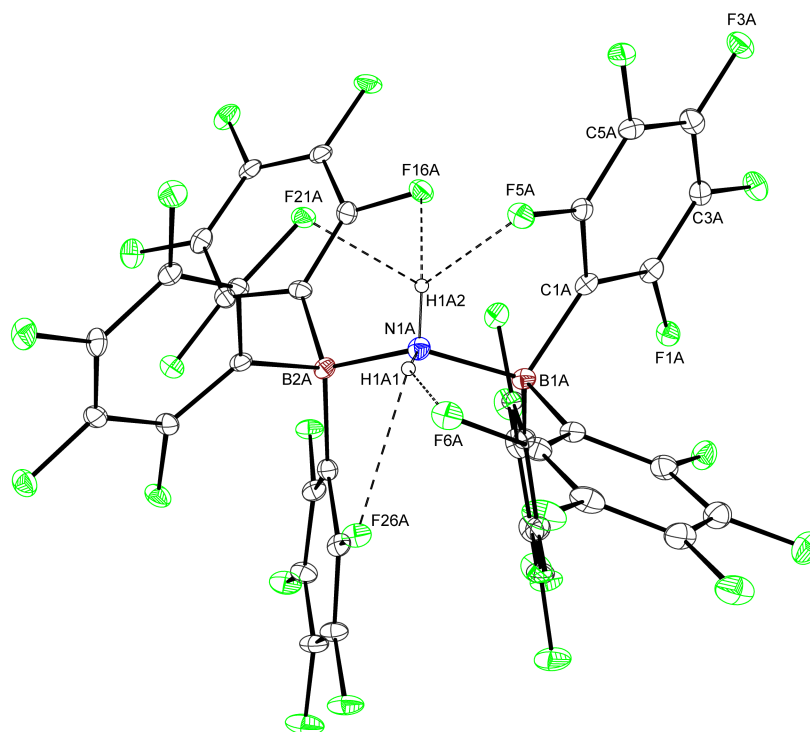

**Figure S18.** ORTEP diagram (40% probability thermal ellipsoids) of the anionic unit  $[\text{NH}_2\{\text{B}(\text{C}_6\text{F}_5)_3\}_2]^-$  in complex **4** with important atoms labeled. Dotted lines indicate  $\text{H}\cdots\text{F}$  hydrogen bonding. Selected bond distances ( $\text{\AA}$ ):  $\text{B1A}-\text{N1A}$  1.634(7),  $\text{B2A}-\text{N1A}$  1.621(6),  $\text{H1A1}\cdots\text{F6A}$  1.924(4),  $\text{H1A1}\cdots\text{F26A}$  2.507(4),  $\text{H1A2}\cdots\text{F5A}$  2.239(4),  $\text{H1A2}\cdots\text{F16A}$  2.068(4),  $\text{H1A2}\cdots\text{F21A}$  2.230(3),  $\text{N1A}-(\text{H1A1})-\text{F6A}$  2.781(7),  $\text{N1A}-(\text{H1A1})-\text{F26A}$  2.926(8),  $\text{N1A}-(\text{H1A2})-\text{F5A}$  2.803(7),  $\text{N1A}-(\text{H1A2})-\text{F16A}$  2.769(8),  $\text{N1A}-(\text{H1A2})-\text{F21A}$  2.743(6).

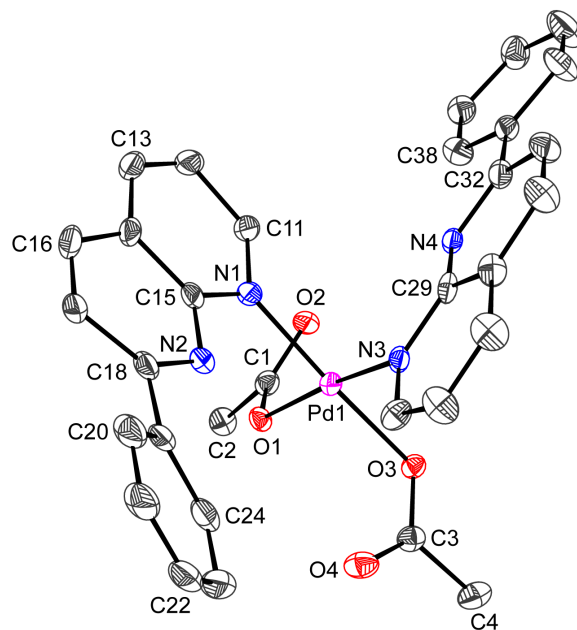

**Figure S19.** ORTEP diagram (40% probability thermal ellipsoids) of  $[\text{Pd}(\text{PhNP})_2(\text{OAc})_2](5)$  with important atoms labeled. Hydrogen atoms are omitted for the sake of clarity. Selected bond distances (Å) and angles (deg): Pd1–N1 2.015(5), Pd1–N3 2.021(6), Pd1–O1 2.026(4), Pd1–O3 2.006(4), N2–C18–C19–C24 26.7(1), N4–C32–C33–C38 6.8(9), N2–C15–N1–Pd1 8.7(7), N4–C29–N3–Pd1 7.0(7).

| <b>Table S1.</b> Crystallographic data and pertinent refinement parameters for compounds <b>1 – 5</b> |                                                                                                                             |                                                                                                                                |                                                                                                                                             |
|-------------------------------------------------------------------------------------------------------|-----------------------------------------------------------------------------------------------------------------------------|--------------------------------------------------------------------------------------------------------------------------------|---------------------------------------------------------------------------------------------------------------------------------------------|
|                                                                                                       | <b>1</b> •2CH <sub>2</sub> Cl <sub>2</sub>                                                                                  | <b>2</b> •2CH <sub>2</sub> Cl <sub>2</sub> •H <sub>2</sub> O                                                                   | <b>3</b> •2.5C <sub>6</sub> H <sub>6</sub>                                                                                                  |
| Empirical formula                                                                                     | C <sub>41</sub> H <sub>37</sub> B <sub>2</sub> Cl <sub>4</sub> F <sub>8</sub> N <sub>9</sub> O <sub>1</sub> Pd <sub>2</sub> | C <sub>58</sub> H <sub>53</sub> B <sub>3</sub> Cl <sub>4</sub> F <sub>12</sub> N <sub>8</sub> O <sub>2</sub> Pd <sub>3</sub> S | C <sub>71</sub> H <sub>61</sub> B <sub>3</sub> Br <sub>1</sub> F <sub>12</sub> N <sub>8</sub> O <sub>1</sub> Pd <sub>3</sub> S <sub>4</sub> |
| Formula Weight                                                                                        | 1200.02                                                                                                                     | 1743.84                                                                                                                        | 1830.14                                                                                                                                     |
| Crystal System                                                                                        | Triclinic                                                                                                                   | Monoclinic                                                                                                                     | Monoclinic                                                                                                                                  |
| Space Group                                                                                           | <i>P</i> -1                                                                                                                 | <i>P</i> 2(1)/c                                                                                                                | <i>P</i> 2(1)/n                                                                                                                             |
| a (Å)                                                                                                 | 11.4647(16)                                                                                                                 | 19.485(2)                                                                                                                      | 22.464(4)                                                                                                                                   |
| b (Å)                                                                                                 | 14.1481(19)                                                                                                                 | 22.628(3)                                                                                                                      | 22.228(4)                                                                                                                                   |
| c (Å)                                                                                                 | 15.650(2)                                                                                                                   | 14.2391(16)                                                                                                                    | 25.760(4)                                                                                                                                   |
| α (deg)                                                                                               | 111.841(2)                                                                                                                  | 90.00                                                                                                                          | 90.00                                                                                                                                       |
| β (deg)                                                                                               | 91.505(2)                                                                                                                   | 100.457(2)                                                                                                                     | 100.596(4)                                                                                                                                  |
| γ (deg)                                                                                               | 108.809(2)                                                                                                                  | 90.00                                                                                                                          | 90.00                                                                                                                                       |
| V (Å <sup>3</sup> )                                                                                   | 2199.4(5)                                                                                                                   | 6173.7(12)                                                                                                                     | 12643(4)                                                                                                                                    |
| Z                                                                                                     | 2                                                                                                                           | 4                                                                                                                              | 8                                                                                                                                           |
| ρ (g cm <sup>-3</sup> )                                                                               | 1.812                                                                                                                       | 1.876                                                                                                                          | 1.92                                                                                                                                        |
| μ (mm <sup>-1</sup> )                                                                                 | 1.142                                                                                                                       | 1.262                                                                                                                          | 1.692                                                                                                                                       |
| F(000)                                                                                                | 1192                                                                                                                        | 3464                                                                                                                           | 7288                                                                                                                                        |
| Reflections Collected                                                                                 | 15527                                                                                                                       | 42227                                                                                                                          | 37413                                                                                                                                       |
| Independent                                                                                           | 7459                                                                                                                        | 10510                                                                                                                          | 20264                                                                                                                                       |
| Observed [I > 2σ(I)]                                                                                  | 5782                                                                                                                        | 6415                                                                                                                           | 8979                                                                                                                                        |
| No. of variables                                                                                      | 607                                                                                                                         | 792                                                                                                                            | 1585                                                                                                                                        |
| GooF                                                                                                  | 1.021                                                                                                                       | 0.933                                                                                                                          | 0.899                                                                                                                                       |
| Rint                                                                                                  | 0.0383                                                                                                                      | 0.0775                                                                                                                         | 0.1189                                                                                                                                      |
| Final R indices [I > 2σ(I)] <sup>a</sup>                                                              | R1 = 0.0452                                                                                                                 | R1 = 0.0618                                                                                                                    | R1 = 0.0856                                                                                                                                 |
|                                                                                                       | wR2 = 0.1090                                                                                                                | wR2 = 0.1489                                                                                                                   | wR2 = 0.1776                                                                                                                                |
| R indices (all data) <sup>a</sup>                                                                     | R1 = 0.0606                                                                                                                 | R1 = 0.0987                                                                                                                    | R1 = 0.1871                                                                                                                                 |
|                                                                                                       | wR2 = 0.1200                                                                                                                | wR2 = 0.1630                                                                                                                   | wR2 = 0.2092                                                                                                                                |
| Flack Parameter                                                                                       | –                                                                                                                           | –                                                                                                                              | –                                                                                                                                           |

<sup>a</sup>R<sub>1</sub> = Σ ||F<sub>o</sub>| - |F<sub>c</sub>||/Σ|F<sub>o</sub>| with F<sub>o</sub><sup>2</sup> > 2σ(F<sub>o</sub><sup>2</sup>). wR<sub>2</sub> = [Σw(|F<sub>o</sub><sup>2</sup> - |F<sub>c</sub><sup>2</sup>||)<sup>2</sup>/Σ|F<sub>o</sub><sup>2</sup>|<sup>2</sup>]<sup>1/2</sup>

| <b>Table S1.</b> ....continued.          |                                                                                                                 |                                                                                               |
|------------------------------------------|-----------------------------------------------------------------------------------------------------------------|-----------------------------------------------------------------------------------------------|
|                                          | <b>4.2CH<sub>2</sub>Cl<sub>2</sub></b>                                                                          | <b>5.CH<sub>2</sub>Cl<sub>2</sub></b>                                                         |
| Empirical formula                        | C <sub>126</sub> H <sub>50</sub> B <sub>4</sub> Cl <sub>4</sub> F <sub>60</sub> N <sub>14</sub> Pd <sub>2</sub> | C <sub>33</sub> H <sub>28</sub> Cl <sub>2</sub> N <sub>4</sub> O <sub>4</sub> Pd <sub>1</sub> |
| Formula Weight                           | 3297.64                                                                                                         | 721.89                                                                                        |
| Crystal System                           | Triclinic                                                                                                       | Orthorhombic                                                                                  |
| Space Group                              | P-1                                                                                                             | Pna21                                                                                         |
| a (Å)                                    | 18.389(3)                                                                                                       | 15.8053(16)                                                                                   |
| b (Å)                                    | 18.555(3)                                                                                                       | 19.5063(19)                                                                                   |
| c (Å)                                    | 22.215(3)                                                                                                       | 20.140(2)                                                                                     |
| α (deg)                                  | 100.835(2)                                                                                                      | 90.00                                                                                         |
| β (deg)                                  | 103.159(2)                                                                                                      | 90.00                                                                                         |
| γ (deg)                                  | 119.476(2)                                                                                                      | 90.00                                                                                         |
| V (Å <sup>3</sup> )                      | 6009.7(16)                                                                                                      | 6209.3(11)                                                                                    |
| Z                                        | 2                                                                                                               | 8                                                                                             |
| ρ (g cm <sup>-3</sup> )                  | 1.822                                                                                                           | 1.544                                                                                         |
| μ (mm <sup>-1</sup> )                    | 0.543                                                                                                           | 0.814                                                                                         |
| F(000)                                   | 3248                                                                                                            | 2928                                                                                          |
| Reflections Collected                    | 44041                                                                                                           | 54617                                                                                         |
| Independent                              | 21075                                                                                                           | 15248                                                                                         |
| Observed [I > 2σ(I)]                     | 14916                                                                                                           | 10472                                                                                         |
| No. of variables                         | 1911                                                                                                            | 797                                                                                           |
| GooF                                     | 1.047                                                                                                           | 1.043                                                                                         |
| Rint                                     | 0.0465                                                                                                          | 0.0631                                                                                        |
| Final R indices [I > 2σ(I)] <sup>a</sup> | R1 = 0.0554                                                                                                     | R1 = 0.0582                                                                                   |
|                                          | wR2 = 0.1356                                                                                                    | wR2 = 0.1302                                                                                  |
| R indices (all data) <sup>a</sup>        | R1 = 0.0837                                                                                                     | R1 = 0.0942                                                                                   |
|                                          | wR2 = 0.1590                                                                                                    | wR2 = 0.1528                                                                                  |
| Flack Parameter                          | –                                                                                                               | -0.01(3)                                                                                      |

<sup>a</sup>R<sub>1</sub> = Σ ||F<sub>o</sub>| - |F<sub>c</sub>||/Σ|F<sub>o</sub>| with F<sub>o</sub><sup>2</sup> > 2σ(F<sub>o</sub><sup>2</sup>). wR<sub>2</sub> = [Σw(|F<sub>o</sub><sup>2</sup> - |F<sub>c</sub><sup>2</sup>||<sup>2</sup>)/Σ|F<sub>o</sub><sup>2</sup>|<sup>2</sup>]<sup>1/2</sup>

## References

- (1) R. R. Thomas, and A. Sen, *Inorg. Synth.* 1989, **26**, 128.
- (2) S. S. Zaleskiy, and V. P. Ananikov, *Organometallics*, 2012, **31**, 2302.
- (3) T. Murahashi, T. Nagai, T. Okuno, T. Matsutani, and H. Kurosawa, *Chem. Commun.*, 2000, 1689.
- (4) C. S. Campos-Fernández, L. M. Thomson, J. R. Gala'n-Mascaro's, X. Ouyang, and K. R. Dunbar, *Inorg. Chem.* 2002, **41**, 1523.
- (5) R. P. Thummel, F. Lefoulon, D. Cantu, R. J. Mahadevan, *J. Org. Chem.* 1984, **49**, 2208.
- (6) SAINT+ Software for CCD diffractometers; Bruker AXS: Madison, WI, 2000
- (7) G. M. Sheldrick, SADABS Program for Correction of Area Detector Data; University of Göttingen: Göttingen, Germany, 1999.
- (8) (a) SHELXTL Package v. 6.10; Bruker AXS: Madison, WI, 2000. (b) G. M. Sheldrick, SHELXS-86 and SHELXL-97; University of Göttingen: Göttingen, Germany, 1997.
- (9) (a) J. L. Atwood, and L. J. Barbour, *Cryst. Growth Des.* 2003, **3**, 3. (b) L. J. Barbour, *J. Supramol. Chem.* 2001, **1**, 189.
- (10) A. L. Spek, *Acta Cryst.* 2009, **D65**, 148.
- (11) L. J. Farrugia, *J. Appl. Cryst.* 1997, **30**, 565.
